# Supplementary material for: Dependence on Myb expression is attenuated in myeloid leukaemia with N-terminal CEBPA mutations
Source: Life Sci Alliance. 2019 Mar 15;2(2):e201800207. doi: 10.26508/lsa.201800207 (PMC6421631; doi:10.26508/lsa.201800207)
Supplement: Supplementary file 3 [file LSA-2018-00207_TableS2.xlsx]

## Sheet: LSC_down
CEP112
ALPPL2
FGF21
ART1
CXCL1
CYP1B1
C1QA
CACNA1G
ADCY2
BUB1B
CDK1
ACAA2
FEN1
CDC45
MELK
BIRC5
IL1RN
S100A8
CENPA
SIRPA
CCNB2
E2F1
COL6A2
CD68
PASK
DMXL2
FNTB
KIF20A
S100A9
CADM3
C3AR1
CARD9
CD14
SLC16A6
ITGAM
TYMS
E2F2
AOAH
RRAD
KIFC1
LIG1
PPP1R12B
LRP2
LAMA4
SCNN1G
PRKG2
IGFBP2
KLK6
ASF1B
DHFR
E2F8
MMP9
CCNA2
CDC6
SAMHD1
KIF18B
CLEC5A
CDC20
ORC1
BUB1
CDCA8
CENPM
POLA2
THOC5
CDC25C
CHST15
TYMP
CDKN3
GPC5
FER1L4
VSIG4
PLK1
NCF2
IFI30
SLC6A6
ALDH4A1
FGR
FPR1
GTSE1
ESPL1
SMC2
CCNB1
GINS2
STX11
CEBPE
IGSF6
DNAAF1
HMMR
PTGER3
RAD51
CD93
CD226
LARP7
RRM2
HAL
SHCBP1
PALB2
CCL5
GIMAP5
PRTN3
ALDH1L1
COL18A1
PRMT7
REST
CTSG
DLX4
LGALS2
MEGF6
NPAS3
ARHGEF15
GGT5
HOMER3
P2RX5
SMC1A
IGFBP7
TMEM53
IGLL1
SPATA6
TNS1
G0S2
IST1
CD86
PPP3CC
CASP1
FGGY
GM2A
TPI1
NDRG2
SERGEF
SCNN1A
ADCK2
CCL4
GDF3
NUSAP1
ALOX5
SAC3D1
AP1S1
CCR1
PRUNE
TLR2
POLM
TOP2A
CAPG
LMNB1
SLC15A3
MS4A4A
LILRA6
VDR
LGALS1
MOGS
SLC22A4
CD38
MAFB
SLC11A1
ERMAP
LGALS3
IL1B
UBE3B
GPR18
HPSE
IL2RB
MAPK13
PILRA
VCAN
COCH
CXCR3
FGL2
CDC42EP3
TEX14
EGR2
TMEM161A
OSGIN2
HIST1H3B
PHLDA1
TUBB2B
APOOL
ENC1
NCAPG
ELL2
MS4A3
MAGEF1
NIPAL3
CX3CR1
GPR65
PLAA
CSF2
ELANE
LRRC49
ITGA2B
ZWINT
ADAP2
GALNT12
MINPP1
MOSPD3
CD163
PRDM1
HNMT
ONECUT2
YES1
TNFAIP6
DIEXF
USP46
MRC2
LETM1
CEBPD
NR4A1
TEP1
VAMP1

## Sheet: AML treat. up
EFEMP1
GABRB1
CXCR1
ATF6B
FLNA
CFP
NPR2
IZUMO4
SGPL1
POLR2A
RPL11
PAX5
HIST1H4C
MPST
RFNG
HP
SLC10A1
CLPP
EPB41
RPS27A
ZKSCAN5
DNAJA2
EFNA2
SEMA6C
MAP2K1
PGK1
RPL17
S100A2

## Sheet: GMP_vs_CLP_up
CXCL13
CD48
G3BP2
EHD4
RBM10
BIRC2
GJA1
PFKL
TNFSF11
CALHM2
CAPZA1
NDUFS2
CDKN1B
IDH2
ABHD4
WIPF1
RNASEL
CPT1A
FNTA
SERPINI1
MYL10
ZDHHC12
PPP1R3C
BSG
CDKN2AIPNL
GLOD4
ASRGL1
PHKB
ATE1
KCTD1
DEK
ATP5F1
NEK7
RABGAP1L
RBM7
ATP5A1
PRPS1
SERPINB9
YIPF4
TSPAN13
AP3S1
KLHL7
EGLN3
CAMK4
ACYP1
MRPL50
OSGIN2
DHX57
ACP2
CD109
RNGTT
ANAPC13
RAB22A
IGSF9
HAUS1
GMPR
NUP88
INSL6
TDP2
APOOL
TTC7B
NDUFA8
IMPA1
STAT4
SLC4A8
TMEM216
ATCAY
PLEKHA2
DNAJC15
CLPP
SLAIN1
TLCD2
FAH
CLPB
PRDM5
RMND1
TANC1
GRHPR
MBNL3
PHGDH
CYB5A
SMARCAL1
DYNLRB1
SAT1
CUTA
CLDND1
DCAF15
PTPN1
EIF4E3
ACSF3
TRPV2
RCSD1
DOCK8
FAM129B
HNRNPUL1
GPSM3
TMEM134
CAPG
PPIB
LMNB1
SSBP4
IL2RB
PANX1
CD38
RYK
PARP9
SERPINE2
CHFR
DCTN2
APOBEC1
USF1
GRN
ANGPTL4
HDLBP
BSCL2
YIPF3
MPDU1
MRPL14
FERMT3
PLEC
NFIA
SCAF11
RAD21
STARD3NL
GEMIN2
HRAS
ILK
OSTF1
RNF5
FMNL1
IPP
TXNRD2
MTMR14
TOR3A
ANAPC1
TMCC2
IPO9
GLTP
TMEM129
MFSD6
NT5C
TMCO6
ITGB1BP1
VRK2
GLRX
CTNNA1
EBPL
IQGAP3
GALE
IFT27
MRPL46
MTMR4
CAPN10
LAMTOR3
IL15
SPAG5
RNF14
HERPUD1
TUBB4B
AGL
DUSP10
MXI1
UBAC1
SAAL1
FANCG
RECQL
COX5A
LCLAT1
USP39
MRPL10
PIGR
MAD1L1
GTPBP2
39692
TMEM9B

## Sheet: Pos. regulation apoptosis
BAX
FAP
DLC1
SIRT2
BOK
CXCR3
RPS3
ENDOG
ZC3H12A
PTGIS

## Sheet: LSC_up
GP6
CFHR2
CLDN18
AGT
CYP2R1
ABLIM1
GLRA2
PRKDC
AMELX
DBT
CACYBP
DCAF4
MPHOSPH9
TRIM23
MAF
AGFG2
FBXO9
LGALSL
DCAKD
B4GALT4
MMP11
KANK1
LAMB2
PPP1R9A
TNIK
ZCCHC4
SLIT2
PRLH
NTRK3
TMPRSS11D
HJURP
ITGB4
ITGB3
MAB21L2
ARIH2
ETS1
STAM2
JAG2
MTUS1
PEX1
RNASEH2B
GEMIN6
TSPAN5
SLC25A42
GATA1
N4BP1
PTMS
PEX5
UBR2
VEGFB
CCND1
CDC37L1
JRKL
TMEM140
COL7A1
PIK3C3
CDK14
RSU1
PIK3IP1
BPHL
NF2
LLPH
ZMYM5
GPR4
YBX1
EVPL
GRIK5
DST
RCAN1
SALL2
CEP76
ANXA9
OTUD4
SENP6
TOP3B
ZFP36L1
BCL11A
HCFC1
INO80B
GAN
ZC3H7B
LPP
MSR1
DLG3
UBR4
MAPK7
NF1
MED20
ALS2CL
RBPMS
WDFY3
BIN1
MYO10
KAZN
ITFG2
PDLIM5
ISG20
ZBED4
GPATCH1
IGF1R
TRIM33
COL6A1
CPT2
GPR1
NCLN
CTSZ
IRF6
KEL
ITGA10
SLC9A5
PPP1R3D
SLC1A2
SMAD6
SRPK3
MFSD6
HDAC6
UNC5B
MID2
TSPAN9

## Sheet: AML treat. down
CCNG1
CCND1
CDK8
CCNG2
SEC62
CD2AP
FBXO21
CDH2
TNFRSF10B
MYB
SEC24A
ACOX1
NR2C1
NKTR
PREP
RGL2
FSCN2
RXRB
DDX17
SRSF6
TBC1D5
DDR1
MRPL28
VPS52
PPT2
VTI1B
PIM2
ZFYVE26

## Sheet: Neg. regulation G1-S transition
CNOT6
BCL2
MDM4
CNOT6L
PKD2
CNOT8
ATM
SOX4
EZH2
DGKZ
PRMT1
CNOT4
CNOT7
CCND1
CNOT2
GIGYF2
PLAGL1
MDM2
BRD7
KANK2
PRKDC
NPM1
PML
CDC73
CDKN2B
RPS27L
TNKS1BP1
TFDP2
CENPJ
CARM1
PLK3
BTG2
PCNA
CNOT10
E2F4
SFN
CCNB1
GTSE1
CDC25C
GADD45A
FHL1
E2F7
RPS27A
MEN1
PCBP4
RBL2
CDK2
CDK1
RPA2
SUSD2
ARID3A
E2F1
AURKA
RFWD3
FBXO31
TFDP1
BAX
DACT1
PLK2
PRMT2
CNOT3
UBC
SMARCA4
GML
CASP2
CNOT1
RB1
FBXO7
PTEN
CDKN1B
EP300
PPP2R5C
CDKN1A
TRIAP1
CTDSP2
RBM38
CRADD
CTDSPL
NACC2
MYO16
CHEK2
CTDSP1
UBB
MUC1
UBA52
ZC3H12D
